1 **Adenylate kinase 1 overexpression increases locomotor activity in medaka fish**

2

3

4 Michiyo Maruyama<sup>1, 2</sup>, Yuko Furukawa<sup>2</sup>, Masato Kinoshita<sup>3</sup>, Atsushi Mukaiyama<sup>4, 5</sup>,  
5 Shuji Akiyama<sup>4, 5</sup>, Takashi Yoshimura<sup>1, 2\*</sup>

6

7

8 <sup>1</sup>Laboratory of Animal Integrative Physiology, Graduate School of Bioagricultural  
9 Sciences, Nagoya University, Nagoya 464-8601, Japan.

10 <sup>2</sup>Institute of Transformative Bio-Molecules (WPI-ITbM), Nagoya University, Nagoya  
11 464-8601, Japan.

12 <sup>3</sup>Division of Applied Biosciences, Graduate School of Agriculture, Kyoto University,  
13 Kyoto 606-8502, Japan

14 <sup>4</sup>Research Center of Integrative Molecular System (CIMoS), Institute for Molecular  
15 Science, National Institute of Natural Sciences, Okazaki 444-8585, Japan.

16 <sup>5</sup>Department of Functional Molecular Science, SOKENDAI (The Graduate University for  
17 Advanced Studies), Okazaki 444-8585, Japan.

18

19 \*Corresponding author

20 E-mail: [takashiy@agr.nagoya-u.ac.jp](mailto:takashiy@agr.nagoya-u.ac.jp) (TY)

21

22

23

## 24 **Abstract**

25 Maintenance of the energy balance is indispensable for cell survival and function.  
26 Adenylate kinase (Ak) is a ubiquitous enzyme highly conserved among many organisms.  
27 Ak plays an essential role in energy regulation by maintaining adenine nucleotide  
28 homeostasis in cells. However, its role at the whole organism level, especially in animal  
29 behavior, remains unclear. Here, we established a model using medaka fish (*Oryzias*  
30 *latipes*) to examine the function of Ak in environmental adaptation. Medaka  
31 overexpressing the major Ak isoform Ak1 exhibited increased locomotor activity  
32 compared to that of the wild type. Interestingly, this increase was temperature dependent.  
33 Our findings suggest that cellular energy balance can modulate locomotor activity.

34

35

## 36 **Introduction**

37 Energy homeostasis is crucial for survival and the maintenance of cell function.  
38 Disruption of energy balance is suggested to be associated with many conditions,  
39 including obesity, heart failure, and neurodegeneration [1–4]. Adenylate kinase (Ak) is  
40 an essential enzyme found in nearly every organism because of its crucial role in cellular  
41 energy metabolism [4–7]. Ak catalyzes the nucleotide phosphoryl exchange reaction

42 (2ADP  $\leftrightarrow$  ATP + AMP) to maintain the adenine nucleotide balance and monitor energy  
43 consumption. Ak and its downstream adenine nucleotide signaling pathway have  
44 attracted attention because of their vital functions in many biological processes, such as  
45 the cell cycle, hormone secretion, and stress tolerance [5,7–11]. To date, nine isoforms of  
46 AK (AK1–AK9) have been identified and well characterized in humans [6]. AK1 is the  
47 major isoform of AK and is expressed in the cytosol of most human tissues, with  
48 particularly high levels in the brain, the heart, skeletal muscles, and erythrocytes. Several  
49 reports have demonstrated the importance of Ak1 in metabolic stress conditions [9–11].  
50 Interestingly, it was recently reported that hyperactive rat strains exhibit increased *Akl*  
51 expression [12]. To our knowledge, however, the role of Ak1 at the whole organism level,  
52 especially in animal behavior, remains unclear.

53         In this study, we sought to clarify the effect of *Akl* on animal behavioral rhythms.  
54 The medaka (*Oryzias latipes*), a small freshwater fish, has recently emerged as a useful  
55 vertebrate model because of its small size and short generation time. Additionally, there  
56 are well-established methods for transgenic and genomic editing in medaka. Behavioral  
57 assays are also well established, for both medaka and zebrafish, but medaka can survive  
58 a wider range of water temperatures (4–40 °C) than zebrafish (20–32 °C), and they exhibit  
59 seasonal behavioral patterns [13–16]. Therefore, the medaka is an excellent model with

60 which to investigate adaptive strategies to environmental changes.

61 Here, we successfully established *Akl*-overexpressing (*Akl*-OE) medaka.

62 Behavioral assays of *Akl*-OE medaka larvae revealed a temperature-dependent increase

63 in locomotor activity. These findings shed new light on the function of *Akl*.

64

65

## 66 **Materials and methods**

### 67 **Ethics statement for animal experiments**

68 All animal studies were performed in accordance with the ARRIVE guidelines. All

69 methods were conducted in compliance with the relevant guidelines and regulations and

70 were approved by the Animal Experiment Committee of Nagoya University (approved

71 number: AGR2020009).

72

### 73 **Animals**

74 Medaka fish (*Oryzias latipes*) were obtained from a local dealer (Fuji 3A Project, Nagoya,

75 Japan). The fish were maintained in a housing system (MEITO system; Meito Suien,

76 Nagoya, Japan) under a 14 h light/10 h dark photoperiod (lights on at 05:00 and off at

77 19:00) at a water temperature of 25 °C. They were fed twice a day with Hikari Labo 450

78 (KYORIN, Tokyo, Japan).

79

## 80 **Gene expression analysis**

81 Total RNA was purified using an RNeasy micro kit (Qiagen, Hilden, Germany) with

82 DNase I. Extracted RNA was stored at  $-80^{\circ}\text{C}$ . Reverse transcription was performed on

83 total RNA (200 ng) using a ReverTra Ace qPCR RT Master Mix (Toyobo, Osaka, Japan).

84 RT-PCR was performed using TaKaRa Ex Taq (Takara Bio Inc., Shiga, Japan) and the

85 following primers: *Akl* forward (F): 5'-ACACTCACCTGTCTTCAGGC-3' and reverse

86 (R): 5'-CTGTGTCCAGGGGTACAAGC-3', and *Actb* F: 5'-

87 GATTCCTTGAAACGAAAAGCC-3' and R: 5'-

88 CAGGGCTGTTGAAAGTCTCAAAC-3'. Amplification was conducted at  $94^{\circ}\text{C}$  for 2

89 min, followed by 30 cycles of  $98^{\circ}\text{C}$  for 10 s,  $60^{\circ}\text{C}$  for 30 s,  $72^{\circ}\text{C}$  for 30 s and  $72^{\circ}\text{C}$  for

90 5 min. The PCR products were analyzed using a MultiNA microchip electrophoresis

91 system (Shimadzu Corporation, Kyoto, Japan).

92 For real-time quantitative PCR (qPCR), 2  $\mu\text{L}$  of the synthesized cDNA was mixed with

93 SYBR Premix Ex Taq II (Takara Bio Inc.) and 0.4  $\mu\text{M}$  primers (same as above) to a total

94 volume of 20  $\mu\text{L}$ . qPCR was performed on a QuantStudio 3 Real-Time PCR System

95 (Applied Biosystems, Waltham, MA, USA). The *Actb* gene was used as an internal

96 control.

97

## 98 **Construction of *Akl*-OE plasmid**

99 Total RNA was purified from embryos at 4 dpf using an RNeasy micro kit (Qiagen) with  
100 DNase I. Reverse transcription of total RNA (200 ng) was performed using a ReverTra  
101 Ace qPCR RT kit (Toyobo). The entire *Akl* open reading frame (excluding the stop  
102 codon) was amplified by PCR (98 °C for 2 min; 35 cycles of 98 °C for 10 s, 65 °C for 30  
103 s, 72 °C for 1 min, and 72 °C for 5 min) using a Q5 Hot Start High-Fidelity 2× Master  
104 Mix (New England Biolabs, Ipswich, MA, USA) and primers containing the restriction  
105 sites of *SpeI* or *BgIII* for subsequent subcloning (F: 5'-  
106 CCACTAGTATGGCAGACAAAATCAAGGAC-3' and R: 5'-  
107 CCAGATCTCTTCAGTGAATCAATAGCCTG-3').

108 The overexpression plasmid contained the Actin  $\beta$  (*Actb*) promoter followed by the first  
109 noncoding exon and the first intron, a 3×FLAG tag, an internal ribosomal entry site  
110 (IRES), GFP and SV40 polyA sequences in the *NotI-NotI* interval [17]. *Akl* cDNA and  
111 plasmids were digested with *SpeI* and *BgIII* and purified using NucleoSpin Gel and PCR  
112 Clean-up (Macherey-Nagel, Düren, Germany). Ligation was performed using Ligation  
113 High Ver. 2 (Toyobo). The sequence of the constructs was confirmed by direct

114 sequencing.

115

## 116 **Generation of *Akl*-OE medaka**

117 The *NotI-NotI* interval of the *Akl*-OE plasmid was purified and diluted with sterilized  
118 water (final concentration: 20 ng/ $\mu$ L) and then microinjected into the cytoplasm of one-  
119 cell stage embryos (F0). F0 fish with mosaic GFP fluorescence were raised and crossed  
120 with WT fish to obtain heterozygous transgene carriers (F1). F1 fish with GFP  
121 fluorescence were crossed with the WT fish. Heterozygous F2 offspring were used for  
122 behavioral experiments.

123

## 124 **Behavioral assays**

125 F2 *Akl*-OE and WT embryos were incubated under a 14L10D cycle at 25 °C until  
126 hatching. At the end of the light phase at 8 dpf, *Akl*-OE larvae and their WT siblings were  
127 distributed among 48 round well plate (CELL STAR; Greiner Bio-One, Kremsmünster,  
128 Austria) each containing 1200  $\mu$ L of water, with 1 larva per well. The plate was then  
129 installed in a DanioVision Observation Chamber (Noldus, Wageningen, the Netherlands).  
130 At 19:00 8 dpf, the light was turned off and the larvae were acclimated for 10 h during  
131 the dark phase. Behavior was recorded from 05:00 9 dpf to 5:00 12 dpf (for 3 days) under

132 a 14 h light (300 lx) and 10 h dark (0 lx) photoperiod (lights on at 05:00 and off at 19:00)  
133 at a water temperature of 15 or 25 °C. Behavior was recorded at 3.75 frames per second  
134 and analyzed using the tracking software EthoVision XT (Noldus). Locomotor activity  
135 was calculated by measuring the “distance moved” every 10 min.

136

## 137 **Statistical analysis**

138 Data are presented as the mean  $\pm$  SEM generated using the statistical software GraphPad  
139 Prism 9. Two-tailed Welch’s *t*-test was used for comparisons between two groups. For  
140 comparisons among three or more groups, two-way ANOVA and post hoc tests were  
141 conducted using GraphPad Prism 9.

142

143

## 144 **Results**

### 145 **Generation of *Akl*-OE medaka**

146 We first examined *Akl* expression in various medaka tissues. Reverse  
147 transcription polymerase chain reaction (RT-PCR) results showed widespread expression  
148 (Fig 1A). To evaluate the effect of constitutively high *Akl* expression, we used a construct  
149 that overexpressed *Akl* in response to regulation of the *Actb* promoter (Fig 1B). This



150 construct enabled us to visualize transgene expression via green fluorescent protein (GFP),  
151 which was linked to the 3' internal ribosome entry site (IRES) downstream of *Actb-Akl*  
152 [17].

153 To generate *Akl*-OE medaka, the construct was microinjected into the cytoplasm  
154 of one-cell stage embryos. Exhibiting chimeric GFP expression embryos were raised as  
155 F0 medaka. These medaka were paired with the wild type to obtain heterozygous  
156 transgene carriers (F1). GFP-expressing F1 medaka were then crossed with the wild type  
157 to generate heterozygous F2 offspring (Figs 1C and D). Overexpression of *Akl* in GFP-  
158 positive F2 medaka was confirmed by quantitative RT-PCR (qPCR) (Fig 1E).

159

160 **Fig 1. Generation of *Akl*-overexpressing medaka.** (A) Electrophoresis image of *Akl*  
161 and *Actb* RT-PCR products in various adult medaka tissues. B, Brain; E, Eye; O, Ovary;  
162 L, Liver; S, Skin; N, No-template control. (B) Structure of *Akl* overexpression construct.  
163 The construct consisted of the medaka *Actb* regulatory region, *Akl* cDNA (without the  
164 stop codon), C-terminus 3× FLAG tag, internal ribosome entry site (IRES), green  
165 fluorescent protein (GFP) open reading frame, and SV40 polyA signal. (C) Design of  
166 genetic crosses for generating heterozygous *Akl*-overexpressing (*Akl*-OE) medaka and  
167 their wild-type (WT) siblings. (D) Bright-field and fluorescence images of WT and *Akl*-

168 OE embryos at 5 days post-fertilization (dpf). (E) *Akl* expression level of larvae at 9 dpf.  
169 Data represent the mean  $\pm$  SEM, n = 4 each. WT expression level was set at 1. The *p*-  
170 value was calculated using two-tailed Welch's *t*-test. Each dot represents an individual  
171 value.

172

### 173 ***Akl*-OE larvae exhibited increased locomotor activity at 25 °C**

174 The high-throughput behavioral tracking assay is well established in larvae of  
175 zebrafish and medaka fish [14,15]. Therefore, we used this method to examine the  
176 locomotor activity of medaka larvae. *Akl*-OE embryos and their wild-type (WT) siblings  
177 were raised in an incubator under a 14 h light/10 h dark (14L10D) cycle (lights on at  
178 05:00 and off at 19:00) at 25 °C. At the end of the light phase at 8 days post-fertilization  
179 (dpf), hatched larvae were placed in each well of a 48-well plate. The plate was then put  
180 into a high-throughput behavior tracking system. Larvae were maintained under a  
181 14L10D cycle at 25 °C. After 10 h of habituation, at the onset of the light phase at 9 dpf,  
182 locomotor activity was tracked for three full days (Fig 2A). The tracking profiles showed  
183 that both *Akl*-OE and WT larvae were more active during the light phase than during the  
184 dark phase (Fig 2B). Compared to that on the first day of the assay, the total distance  
185 moved by the WT larvae significantly decreased on the third day (Fig 2C). As in previous

186 studies [14,15], larvae were not fed during the assay to avoid interrupting it. This may  
187 have caused decreased energy, and hence, decreased activity, later in the experiment.  
188 Notably, the average locomotor activity of the *Akl*-OE larvae tended to be higher than  
189 that of the WT larvae throughout the assay. This trend was particularly obvious on day 3,  
190 at which point the total locomotor activity of the *Akl*-OE larvae was significantly higher  
191 than that of the WT larvae, both in the light and dark phases (Fig 2D).

192

193 **Figure 2. Locomotor activity of *Akl*-overexpressing larvae at 25 °C.** (A) Structure of  
194 the behavioral assay. Larvae (8 dpf) were placed into a photoperiod- and temperature-  
195 controlled chamber (14L10D, 25 °C) at the end of the light phase. After 10 h of  
196 habituation (Hab.), recording was started at the onset of the light phase at 9 dpf and  
197 continued for 3 full days. (B) Mean locomotor activity of *Akl*-overexpressing (*Akl*-OE)  
198 and wild-type (WT) larvae. (C) Total locomotor activity of *Akl*-OE and WT larvae per  
199 day. Data represent the mean  $\pm$  SEM and were analyzed via two-way repeated measures  
200 ANOVA. Effect of time,  $F_{(1,386, 37.43)} = 11.45, p = 0.0006$ ; effect of overexpression,  $F_{(1, 27)}$   
201  $= 7.891, p = 0.0091$ ; effect of interaction,  $F_{(2, 54)} = 0.2186, p = 0.8044$ . \* $p < 0.05$ ; n.s., not  
202 significant (Dunnett's multiple comparisons test, vs. day 1). (D) Total locomotor activity  
203 of *Akl*-OE and WT larvae per day during the light phase (white) and dark phase (gray).

204 Data represent the mean  $\pm$  SEM. The  $p$ -values ( $*p < 0.05$ ) were calculated using two-  
205 tailed Welch's  $t$ -test. Each dot represents an individual value. (B–D)  $n = 15$  (WT),  $n = 14$   
206 (*Akl*-OE).

207

208 ***Akl*-OE larvae did not exhibit increased locomotor activity at**  
209 **15 °C**

210 Ambient temperature directly affects the metabolic rate of ectothermic animals.

211 Therefore, we further examined the locomotor activity of *Akl*-OE larvae at a lower

212 temperature (15 °C), a condition associated with lower energy expenditure. After they

213 were raised at 25 °C, at 8 dpf, larvae were placed in a tracking chamber and exposed to a

214 14L10D cycle at 15 °C (Fig 3A). In both the *Akl*-OE and WT larvae, locomotor activity

215 levels on days 2 and 3 were similar to those on day 1 (Figs 3B and C). This suggests that

216 the larvae conserved their energy until the end of the experiment at the lower temperature.

217 Unlike the results at 25 °C, there was no difference in locomotor activity between the

218 *Akl*-OE and WT larvae throughout the experiment (Fig 3D). This suggests that the

219 increase in the locomotor activity of *Akl*-OE larvae was temperature dependent.

220

221 **Figure 3. Locomotor activity of *Akl*-overexpressing larvae at 15 °C.** (A) Structure of  
222 the behavioral assay. Larvae were maintained in a chamber under a 14L10D cycle at  
223 15 °C. (B) Mean locomotor activity of *Akl*-overexpressing (*Akl*-OE) and wild-type (WT)  
224 larvae.  
225 (C) Total locomotor activity of *Akl*-OE and WT larvae per day. Data represent the mean  
226  $\pm$  SEM and were analyzed via two-way repeated measures ANOVA. Effect of time,  $F_{(1,910,68.74)} = 1.848, p = 0.1669$ ; effect of overexpression,  $F_{(1,36)} = 3.607 \times 10^{-5}, p = 0.9952$ ; effect  
227 of interaction,  $F_{(2,72)} = 0.2813, p = 0.7556$ . n.s., not significant (Dunnett's multiple  
228 comparisons test, vs. day 1). (D) Total locomotor activity of *Akl*-OE and WT larvae per  
229 day during the light phase (white) and dark phase (gray). Data represent the mean  $\pm$  SEM.  
230 n.s., not significant (two-tailed Welch's *t*-test). Each dot represents an individual value.  
231 (B–D)  $n = 20$  (WT),  $n = 18$  (*Akl*-OE).

232

233

## 235 Discussion

236 Ak are essential enzymes that play critical roles in metabolic monitoring and  
237 signaling of cells. Among the Ak family members, we focused on Ak1, the major  
238 cytosolic isoform of Ak. In the present study, in various medaka tissues, we observed *Akl*

239 expression similar to that reported in other animals [6] (Fig 1A). Ak1 is highly conserved  
240 among many organisms. Indeed, the alignment of human AK1 (NP\_000467.1, 194 aa)  
241 with medaka Ak1 (XP\_004074790.1, 194 aa) exhibited 75% identical residues and 88%  
242 similar residues (via the NCBI BLAST Needleman-Wunsch Global Align function).

243 To know the function of Ak1 at the whole organism level, we established an  
244 *Akl*-OE medaka line (Figs 1B–E). Behavioral assays of the medaka larvae revealed that  
245 *Akl*-OE larvae exhibited increased locomotor activity compared with that of the WT  
246 larvae at 25 °C, and the difference between the *Akl*-OE and WT larvae was most obvious  
247 on the last day of the experiment (Fig 2D). *Akl*-OE larvae maintained a higher activity  
248 level throughout the entire experiment, whereas the total amount of locomotor activity of  
249 the WT larvae significantly decreased on day 3 (Fig 2C). In contrast, throughout the  
250 experiment at 15 °C, the locomotor activity of *Akl*-OE larvae did not differ from that of  
251 the WT larvae (Fig 3D). Several knockout studies have shown that *Akl* deficiency can be  
252 compensated for by other members of the Ak family under normal conditions, whereas  
253 *Akl* deficiency leads to failure of metabolic homeostasis under stress conditions  
254 [10,11,18]. As our behavioral assays were conducted without feeding, the lack of energy  
255 later in the experiment might have mimicked metabolic stress even at the moderate  
256 temperature of 25 °C, and this could have caused the large difference in activity between

257 the *Akl*-OE and WT larvae on the last day of the assay.

258 In summary, Ak1 is known to play crucial roles in cell function. Our results  
259 indicate the importance of *Akl* not only at the cellular level but also at the behavioral  
260 level.

261

262

## 263 **Acknowledgments**

264 We thank Drs. T. Nishiwaki-Ohkawa, A. Shinomiya and T. Nakayama for  
265 helpful discussions. We also thank A. Ieda and A. Matsumiya for technical assistance.

266 This research was supported by Joint Research by Institute for Molecular Science  
267 (IMS). (IMS program No, 21-251)

268

269

## 270 **Author contributions**

271 M.M. and T.Y. designed the research. M.M. and Y.F. conducted the experiments  
272 and analyzed the data. M.K., S.A. and A.M. provided new material and methods. M.M.  
273 and T.Y. wrote the manuscript. All authors discussed the results and commented on the  
274 manuscript.

275

276

## 277 **References**

- 278 1. Wells JCK, Siervo M. Obesity and energy balance: Is the tail wagging the dog?  
279 Eur J Clin Nutr. 2011;65: 1173–1189. doi:10.1038/ejcn.2011.132
- 280 2. Ventura-Clapier R, Garnier A, Veksler V. Energy metabolism in heart failure. J  
281 Physiol. 2004;555: 1–13. doi:10.1113/jphysiol.2003.055095
- 282 3. Błaszczuk JW. Energy metabolism decline in the aging brain—pathogenesis of  
283 neurodegenerative disorders. *Metabolites*. 2020. pp. 1–20.  
284 doi:10.3390/metabo10110450
- 285 4. Ionescu MI. Adenylate Kinase: A ubiquitous enzyme correlated with medical  
286 conditions. *Protein J*. 2019;38: 120–133. doi:10.1007/s10930-019-09811-0
- 287 5. Dzeja P, Terzic A. Adenylate kinase and AMP signaling networks: metabolic  
288 monitoring, signal communication and body energy sensing. *Int J Mol Sci*.  
289 2009;10: 1729–1772. doi:10.3390/ijms10041729
- 290 6. Panayiotou C, Solaroli N, Karlsson A. The many isoforms of human adenylate  
291 kinases. *Int J Biochem Cell Biol*. 2014;49: 75–83.  
292 doi:10.1016/j.biocel.2014.01.014



- 293 7. Klepinin A, Zhang S, Klepinina L, Rebane-Klemm E, Terzic A, Kaambre T, et  
294 al. Adenylate kinase and metabolic signaling in cancer cells. *Front Oncol.*  
295 2020;10: 1–9. doi:10.3389/fonc.2020.00660
- 296 8. Karl Olson L, Schroeder W, Paul Robertson R, Goldberg ND, Walseth TF.  
297 Suppression of adenylate kinase catalyzed phosphotransfer precedes and is  
298 associated with glucose-induced insulin secretion in intact HIT-T15 cells. *J Biol*  
299 *Chem.* 1996;271: 16544–16552. doi:10.1074/jbc.271.28.16544
- 300 9. Janssen E, Dzeja PP, Oerlemans F, Simonetti AW, Heerschap A, De Haan A, et  
301 al. Adenylate kinase 1 gene deletion disrupts muscle energetic economy despite  
302 metabolic rearrangement. *EMBO J.* 2000;19: 6371–6381.  
303 doi:10.1093/emboj/19.23.6371
- 304 10. Dzeja PP, Bast P, Pucar D, Wieringa B, Terzic A. Defective metabolic signaling  
305 in adenylate kinase AK1 gene knock-out hearts compromises post-ischemic  
306 coronary reflow. *J Biol Chem.* 2007;282: 31366–31372.  
307 doi:10.1074/jbc.M705268200
- 308 11. Xie M, Zhang G, Zhang H, Chen F, Chen Y, Zhuang Y, et al. Adenylate kinase 1  
309 deficiency disrupts mouse sperm motility under conditions of energy stress. *Biol*  
310 *Reprod.* 2020;103: 1121–1131. doi:10.1093/biolre/ioaa134

- 311 12. Horiguchi T, Miyatake Y, Miyoshi K, Tanimura A, Hagita H, Sakaue H, et al.  
312 Gene-expression profile reveals the genetic and acquired phenotypes of  
313 hyperactive mutant SPORTS rat. *J Med Investig*. 2020;67: 51–61.  
314 doi:10.2152/jmi.67.51
- 315 13. Nakayama T, Okimura K, Shen J, Guh YJ, Katherine Tamai T, Shimada A, et al.  
316 Seasonal changes in NRF2 antioxidant pathway regulates winter depression-like  
317 behavior. *Proc Natl Acad Sci U S A*. 2020;117: 9594–9603.  
318 doi:10.1073/pnas.2000278117
- 319 14. Fontinha BM, Zekoll T, Al-Rawi M, Gallach M, Reithofer F, Barker AJ, et al.  
320 TMT-Opsins differentially modulate medaka brain function in a context-  
321 dependent manner. *PLoS Biol*. 2021; 19: e3001012.  
322 doi:10.1371/JOURNAL.PBIO.3001012
- 323 15. Rihel J, Prober DA, Arvanites A, Lam K, Zimmerman S, Jang S, et al. Zebrafish  
324 behavioral profiling links drugs to biological targets and rest/wake regulation.  
325 *Science*. 2010;327: 348–351. doi:10.1126/science.1183090
- 326 16. Wittbrodt J, Shima A, Scharl M. Medaka - A model organism from the far east.  
327 *Nat Rev Genet*. 2002; 3: 53–64. doi:10.1038/nrg704
- 328 17. Fukamachi S, Yada T, Meyer A, Kinoshita M. Effects of constitutive expression

329 of somatolactin alpha on skin pigmentation in medaka. *Gene*. 2009;442: 81–87.

330 doi:10.1016/j.gene.2009.04.010

331 18. Pucar D, Janssen E, Dzeja PP, Juranic N, Macura S, Wieringa B, et al.

332 Compromised energetics in the adenylate kinase AK1 gene knockout heart under

333 metabolic stress. *J Biol Chem*. 2000;275: 41424–41429.

334 doi:10.1074/jbc.M007903200

335

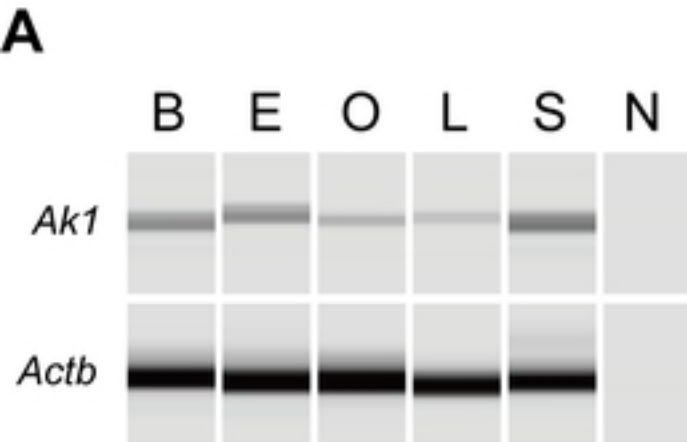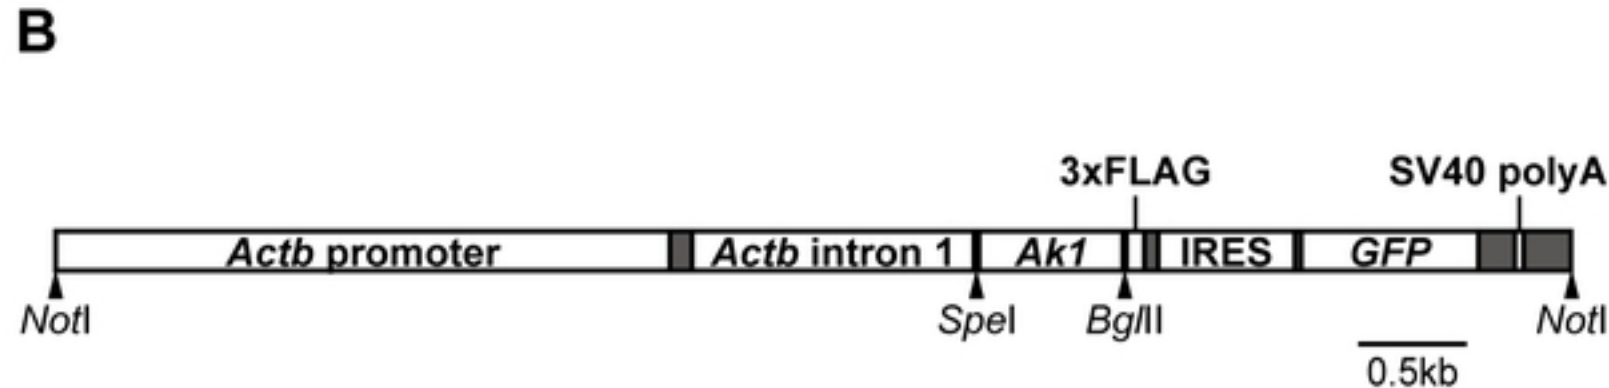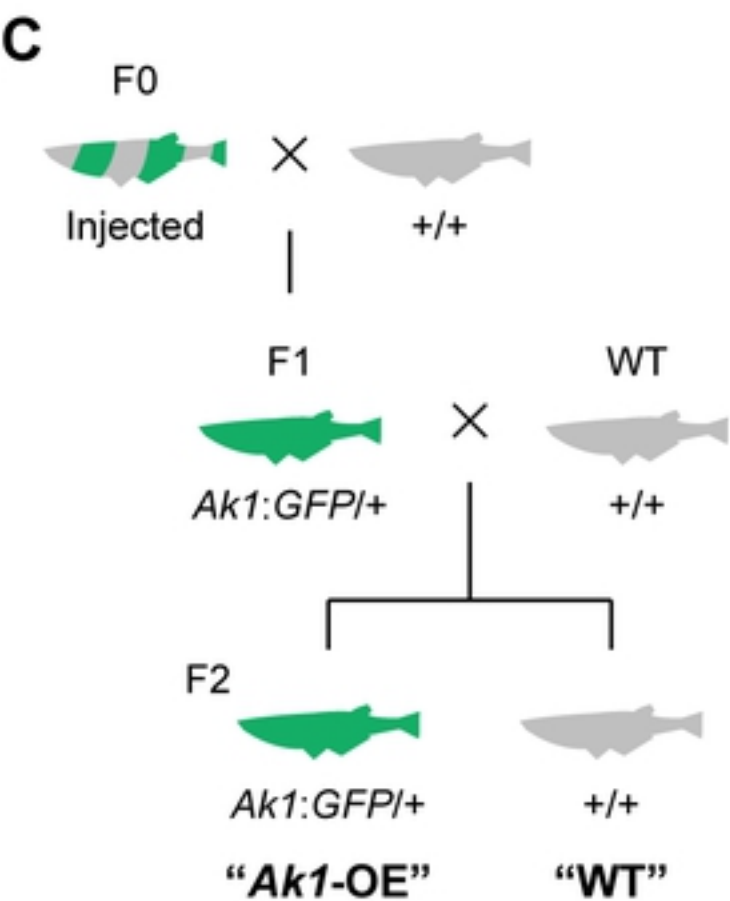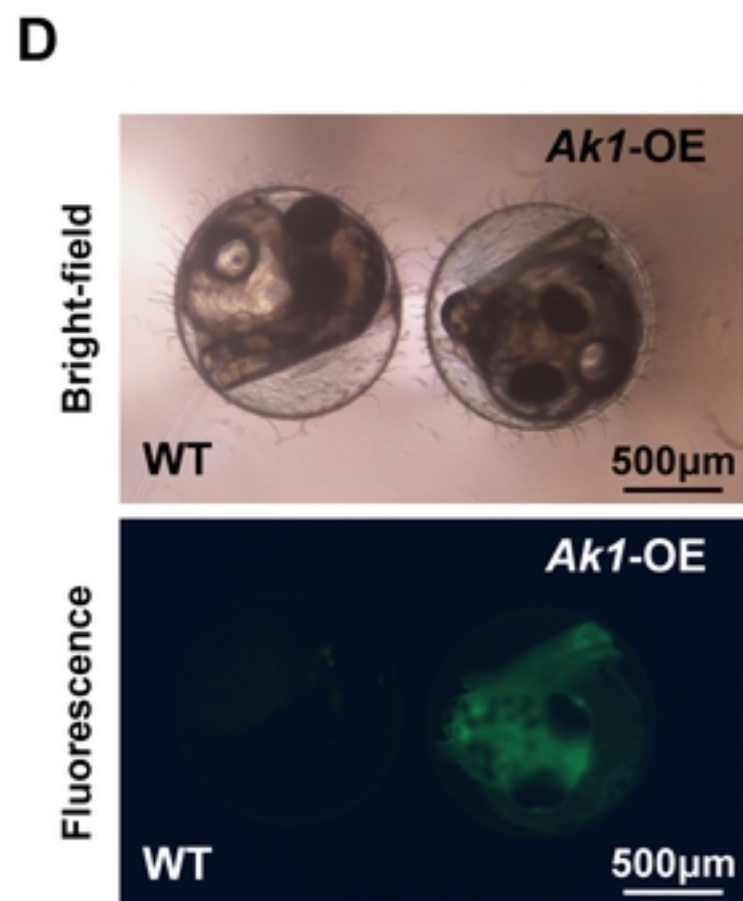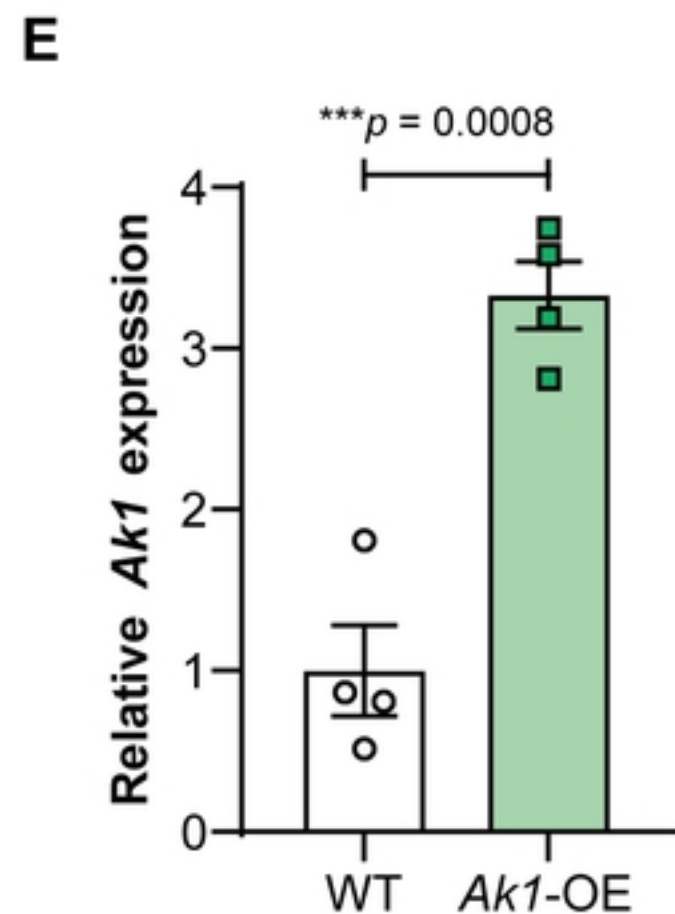

Figure 1

**A**

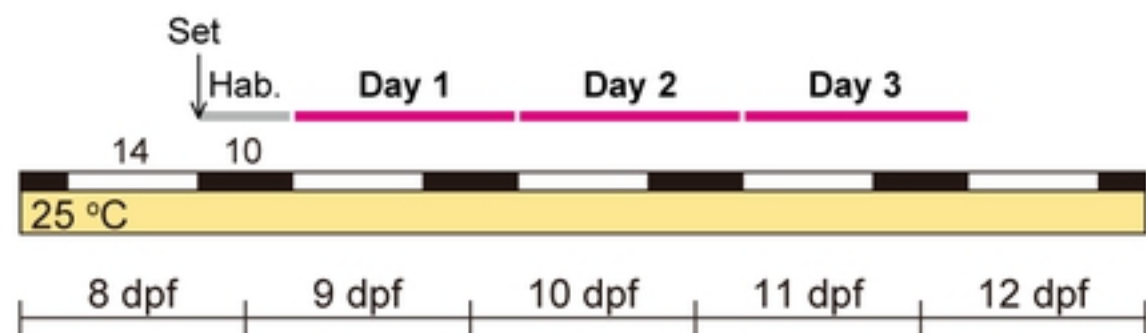

**B**

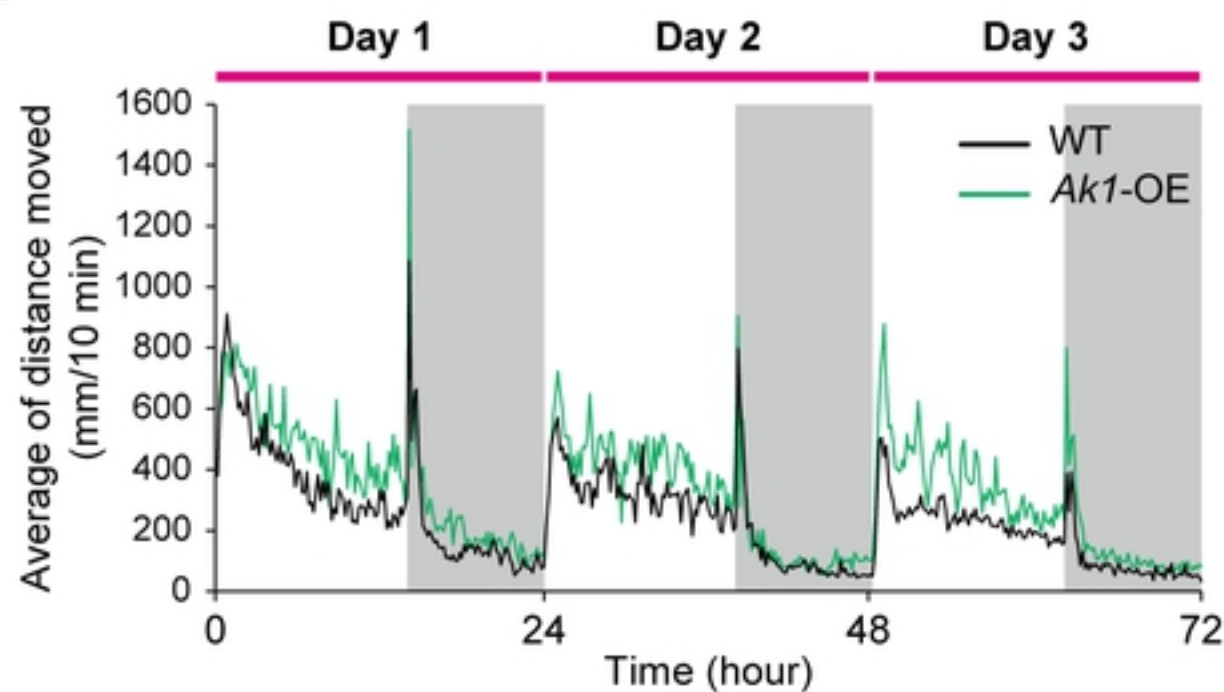

**C**

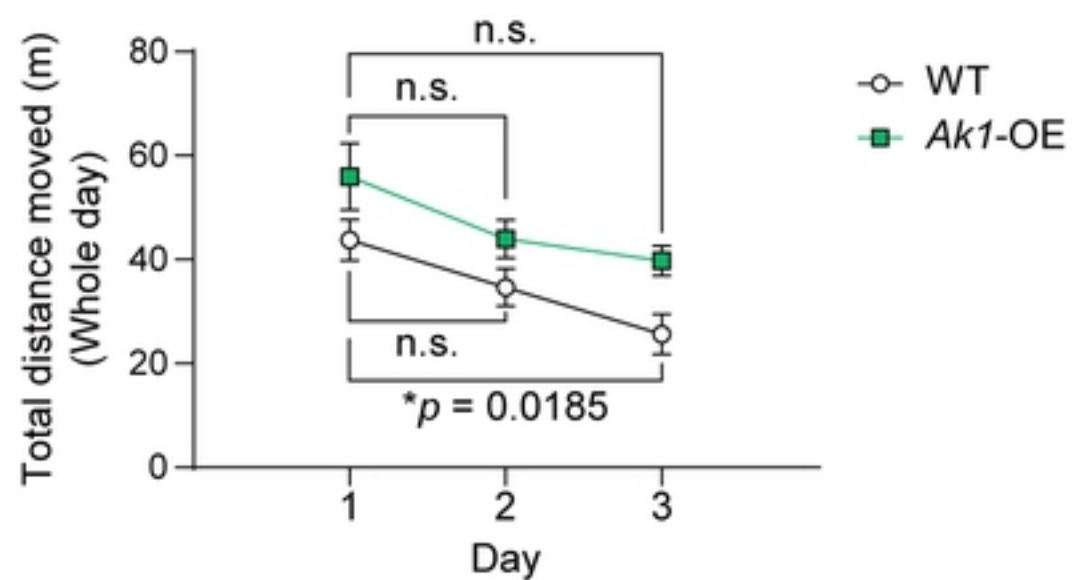

**D**

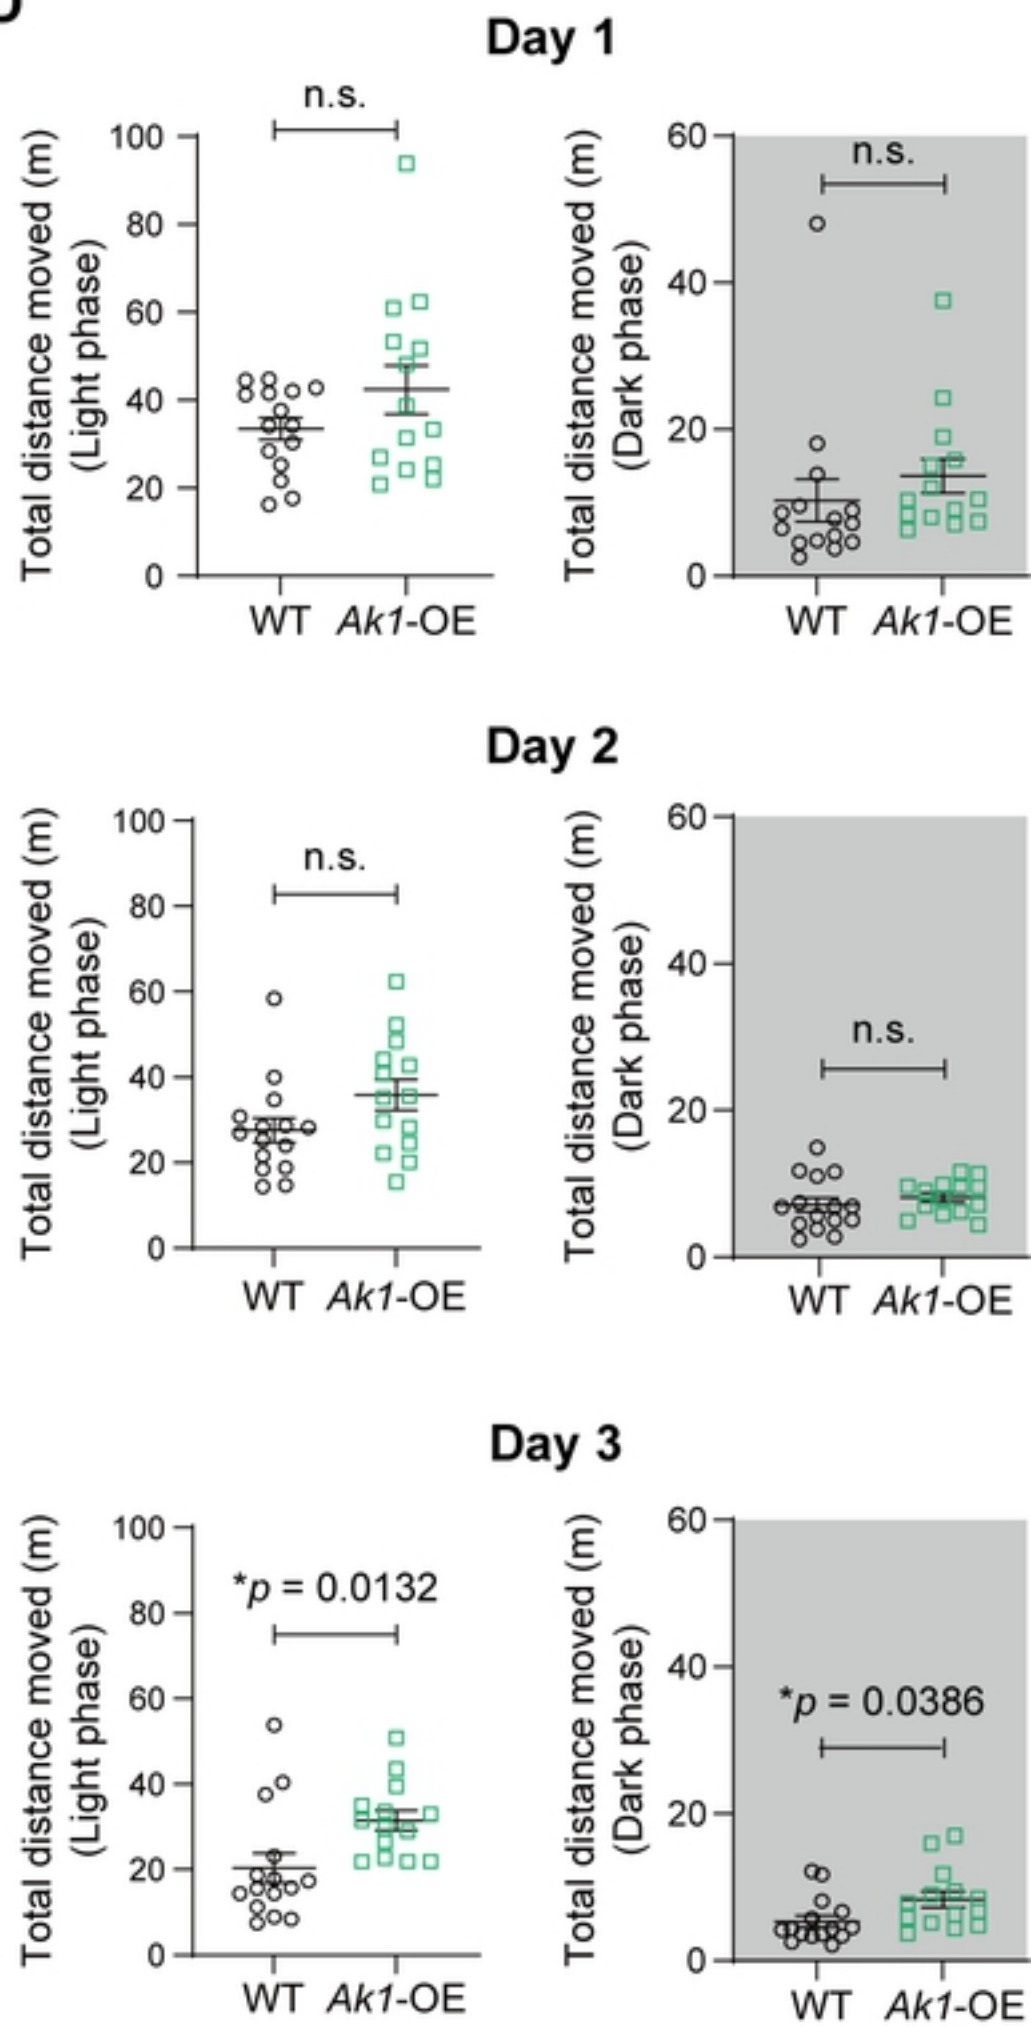

Figure 2

**A**

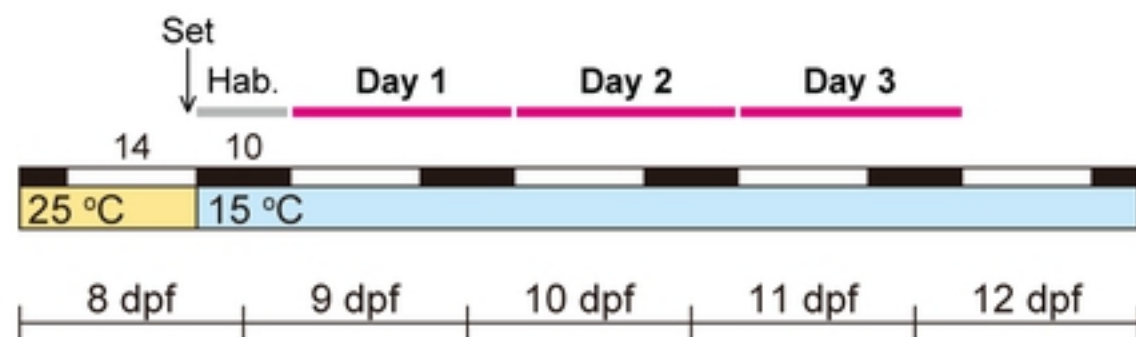

**B**

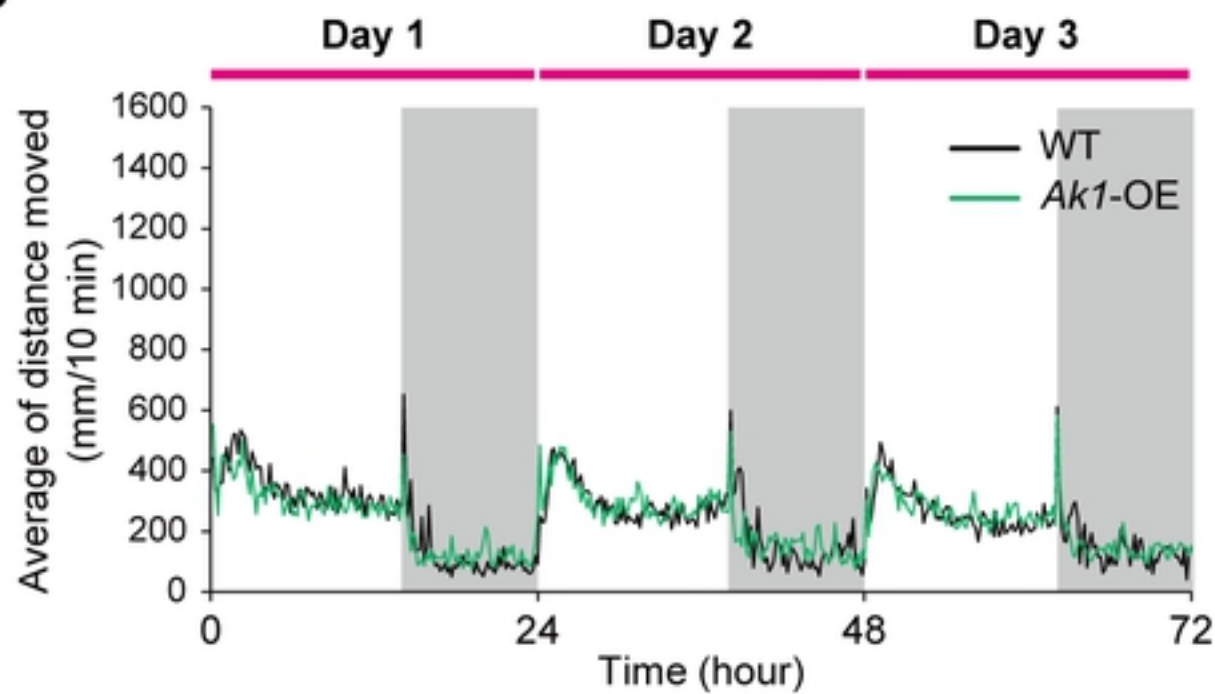

**C**

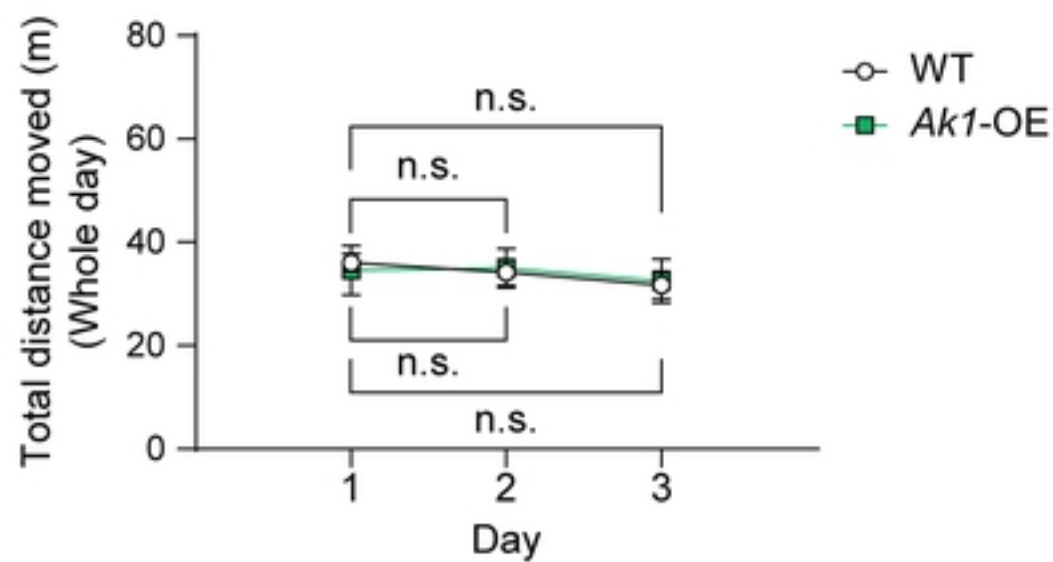

**D**

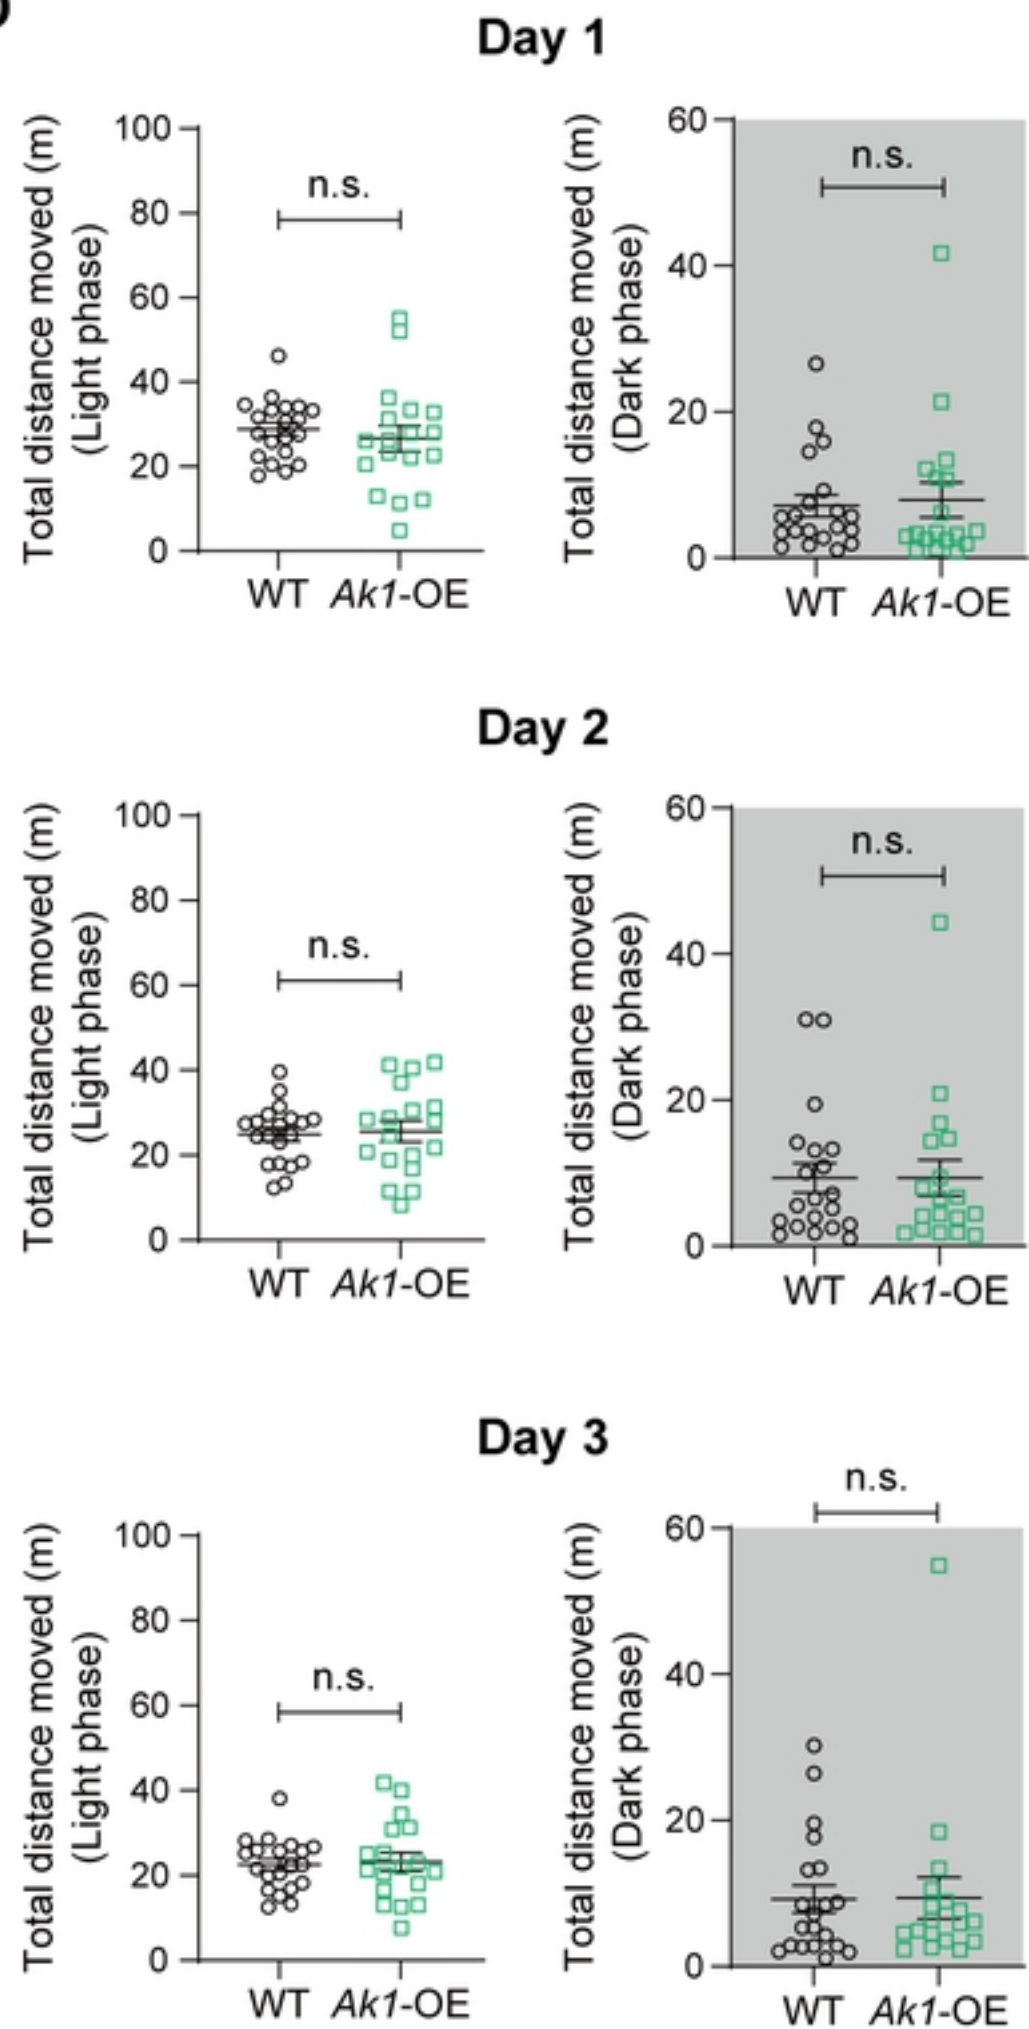

Figure 3
